# Supplementary material
Source: PubMed Central journal article supplement (PMC4060676)
Supplement: 1323350111_pnas.201323350SI.pdf [file 1323350111_pnas.201323350SI.pdf]

# Supporting Information

Buhr and Van Gelder 10.1073/pnas.1323350111

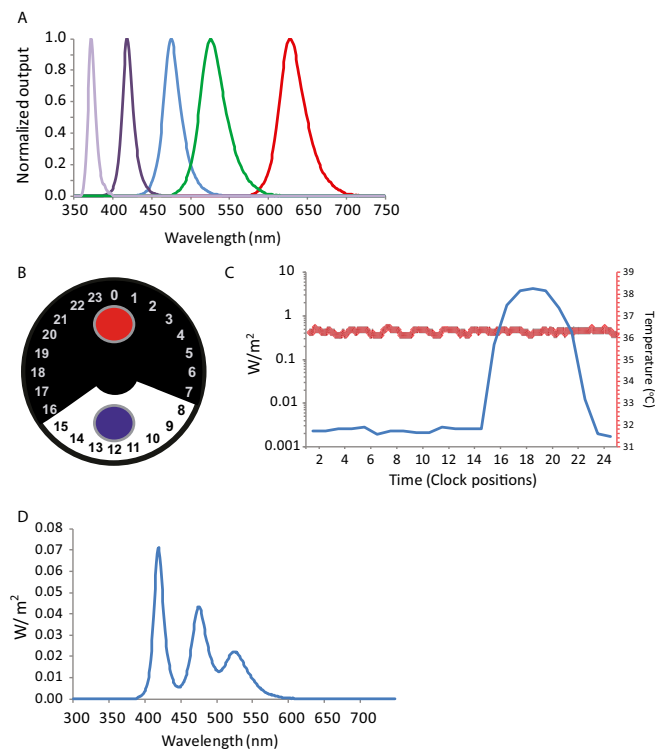

**Fig. S1.** (A) The peak and bandwidth of the LEDs used in this study. All values are normalized. (B) Schematic of clock apparatus. Blue and red circles represent the 0° and 180° positions of culture dishes. The transparent window on an opaque disk is rotated with a 24-h period. (C) Total irradiance and temperature at each time point across a 24-h day as experienced by culture dishes inside the clock apparatus. (D) Spectral irradiance of light experienced by cultured tissues and mice in running wheels.
